# Supplementary material for: Transcriptome analysis of the hormone-sensing cells in mammary epithelial reveals dynamic changes in early pregnancy
Source: PubMed Central journal article supplement (PMC4314744; doi:10.1186/s12861-015-0058-9), 2015-01-27

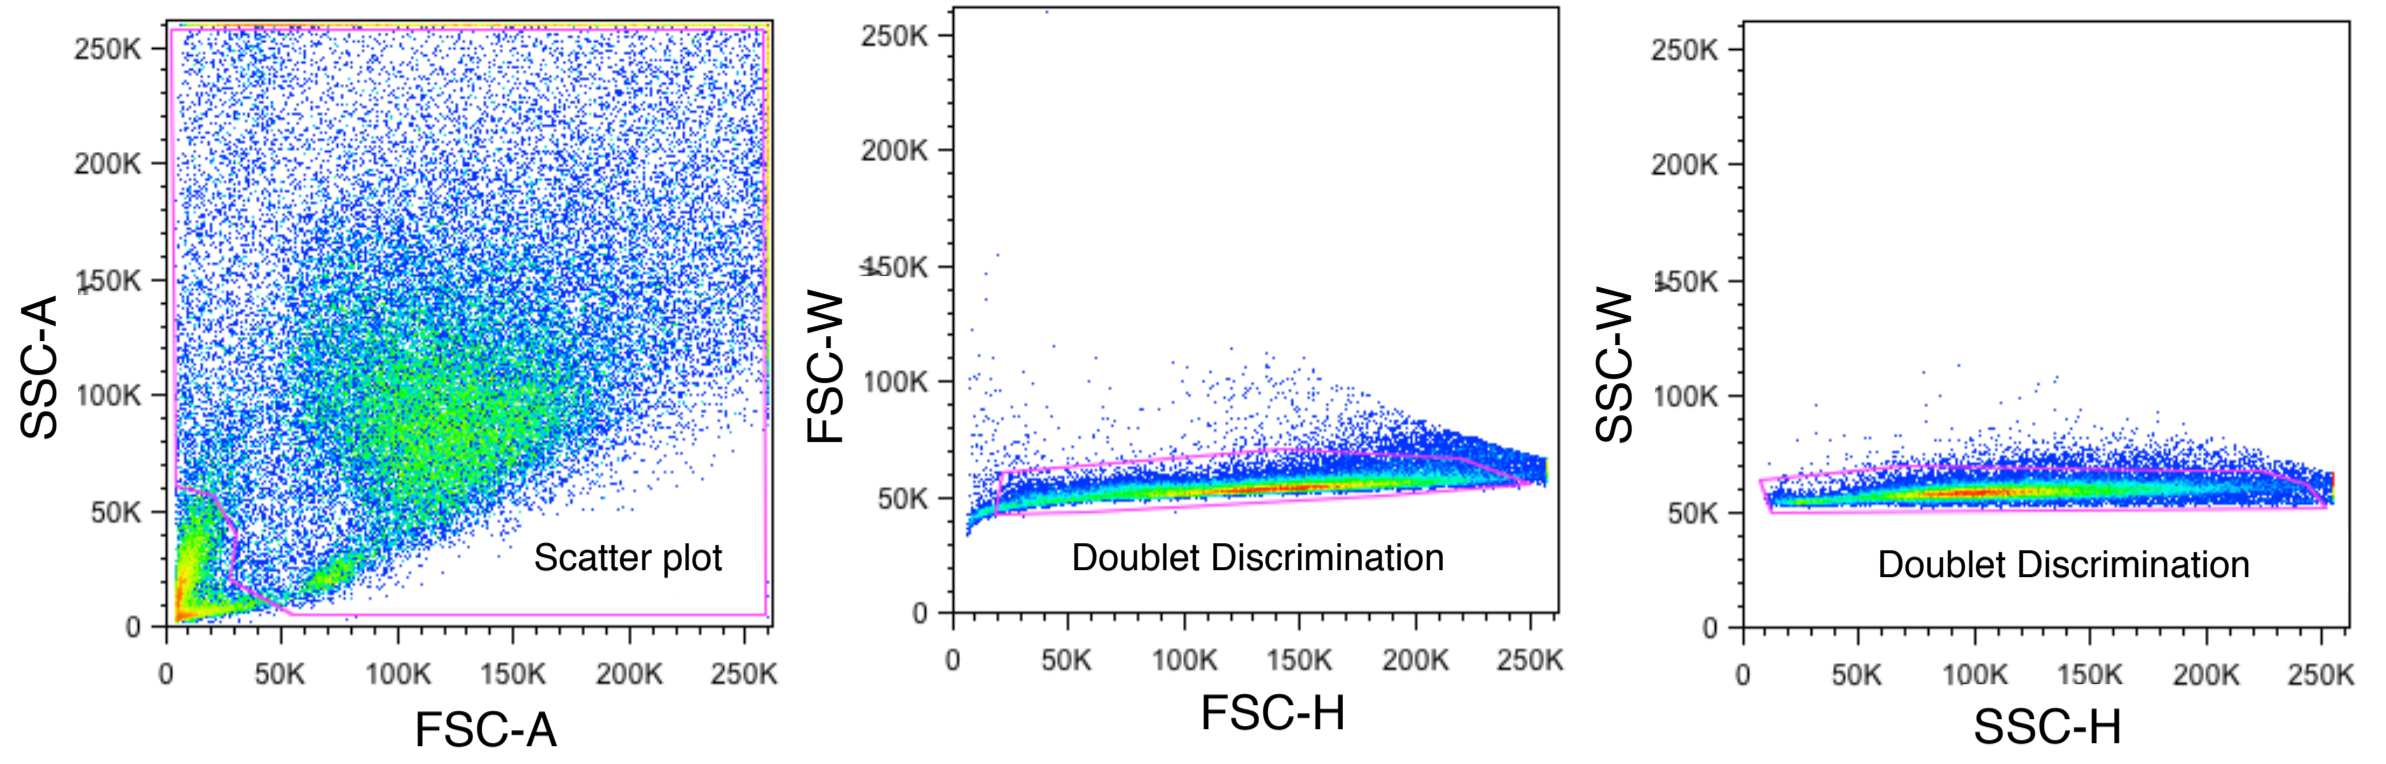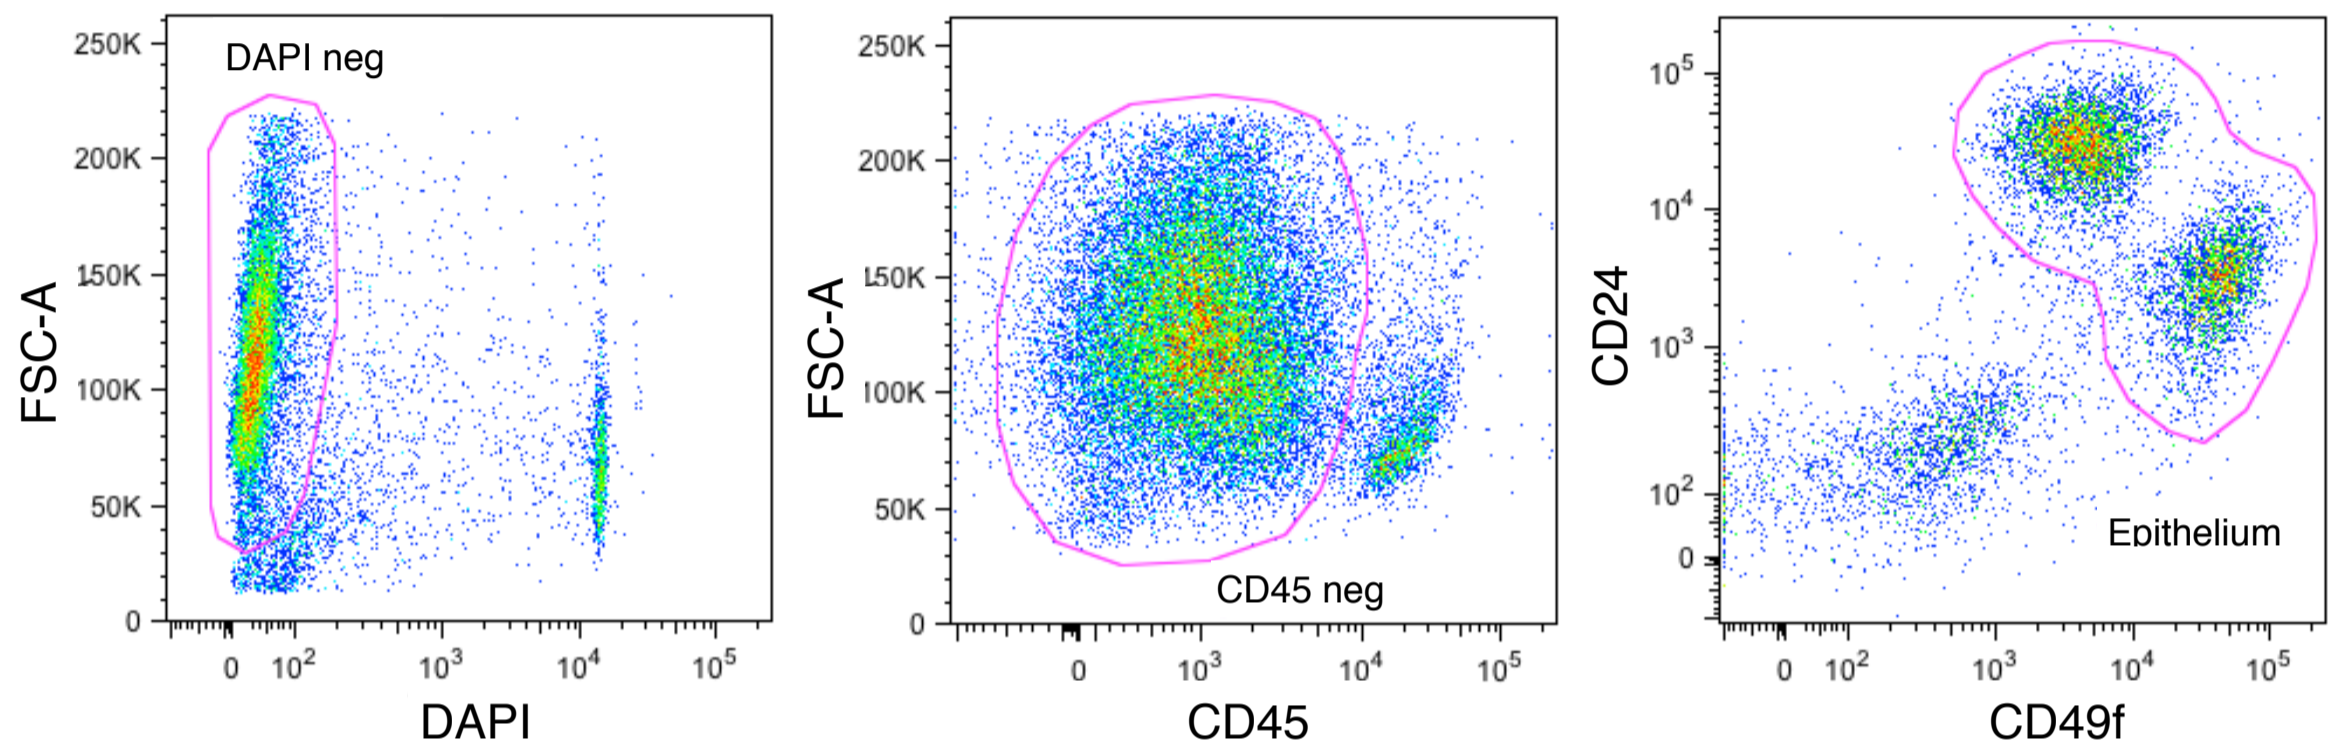

**Virgin**

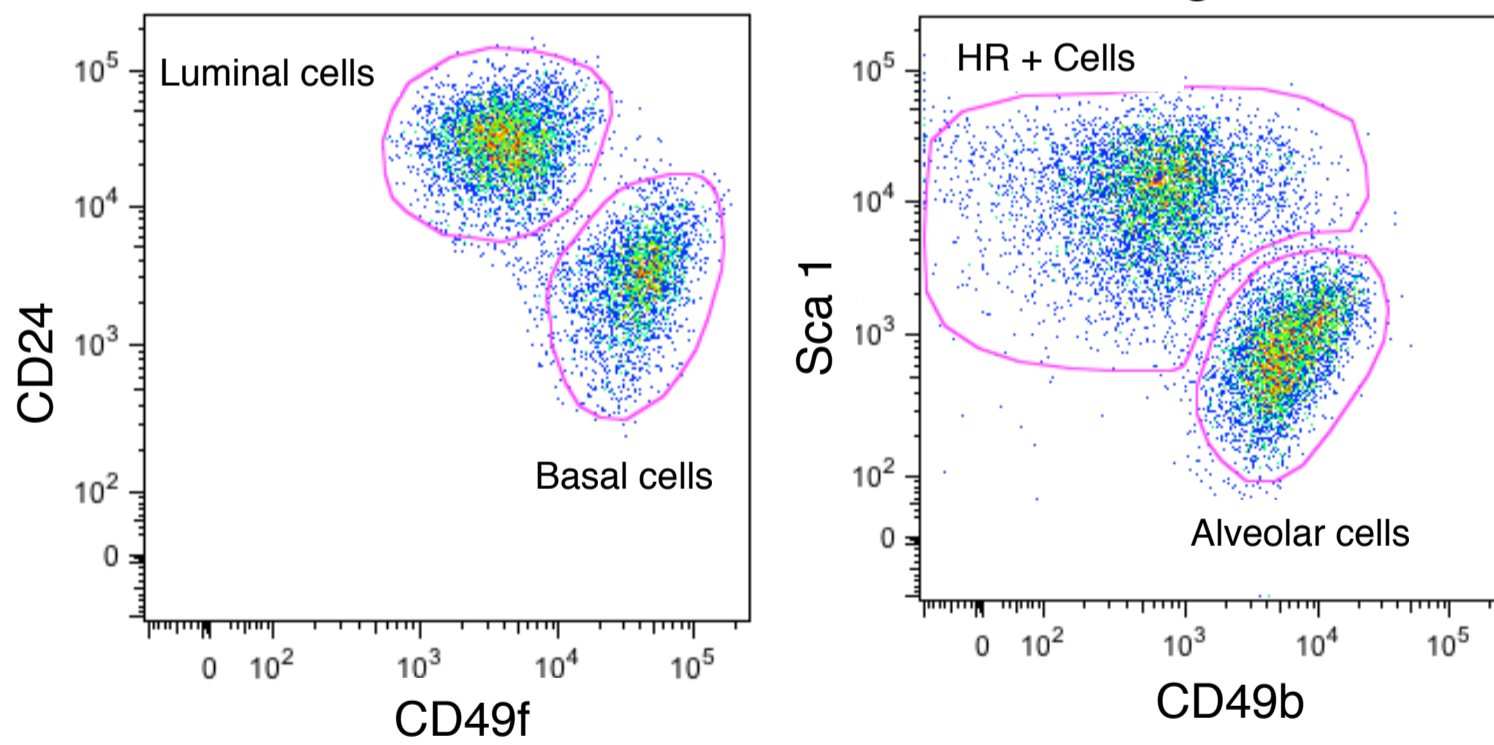

**3d pregnant**

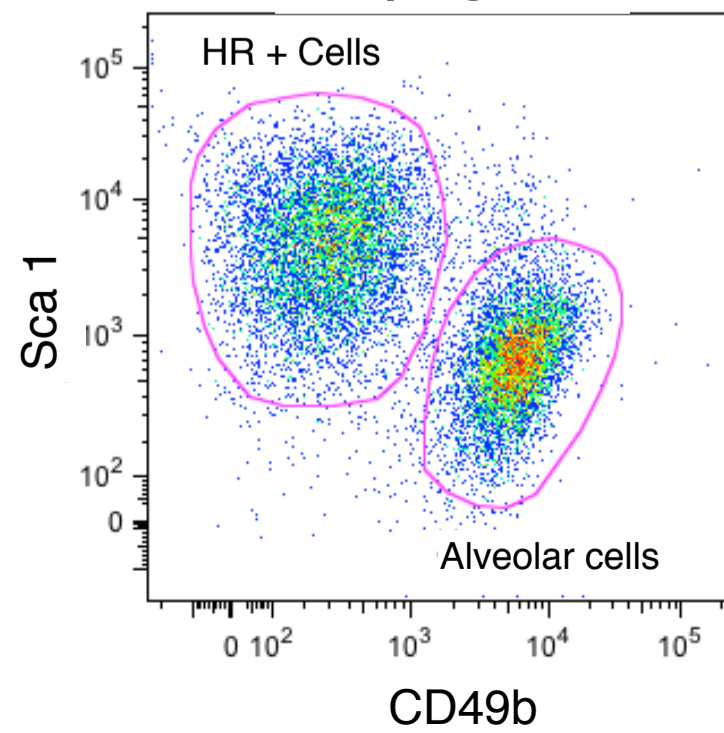

**7d pregnant**

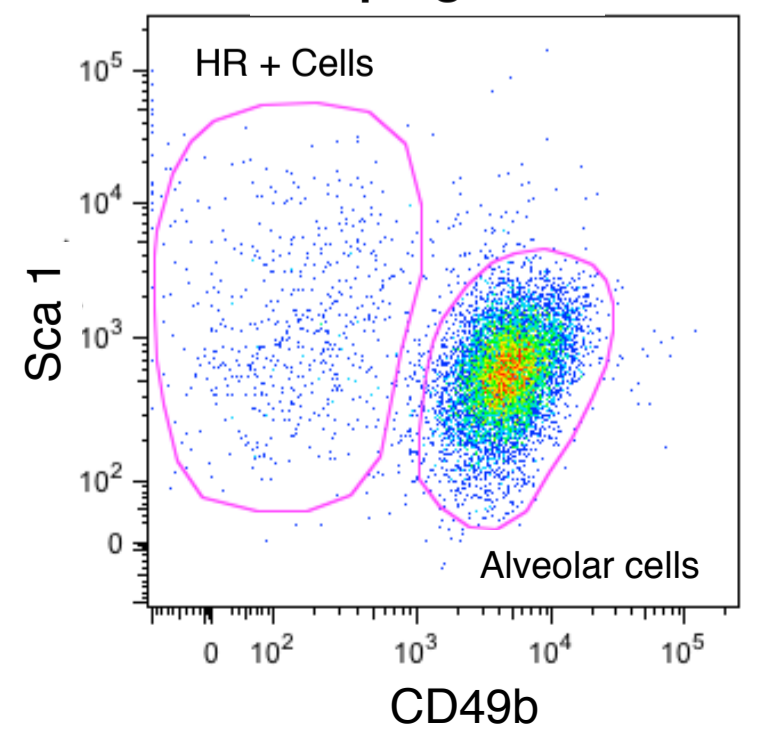

Supplement: 12861_2015_58_MOESM1_ESM.pdf [file 12861_2015_58_MOESM1_ESM.pdf]
