# Supplementary material for: Transcriptome analysis of the hormone-sensing cells in mammary epithelial reveals dynamic changes in early pregnancy
Source: PubMed Central journal article supplement (PMC4314744; doi:10.1186/s12861-015-0058-9), 2015-01-27

A

|          | 3D vs Vir | 7D vs Vir |
|----------|-----------|-----------|
| Cdk4     | 1.77      | 1.18      |
| Cdk6     | -0.10     | -0.14     |
| CyclinD1 | 0.04      | -0.61     |
| Cdk2     | 0.22      | -0.20     |
| Cyclin E | 0.21      | 0.09      |
| p15      | -0.79     | -1.51     |
| p16      | 0.05      | -0.02     |
| p19      | -0.09     | -0.00     |
| p21      | -1.71     | -1.72     |
| p27      | -0.10     | -0.12     |
| Cdc25a   | -0.01     | 0.02      |
| E2f1     | 2.34      | 0.365     |
| E2f2     | 0.05      | 0.10      |
| E2f3     | 0.45      | 0.44      |
| E2f4     | 0.48      | 0.25      |
| E2f5     | -0.33     | -0.12     |
| E2f6     | 0.15      | -0.01     |
| E2f7     | 0.12      | 0.02      |
| Cdk2     | 0.22      | -0.20     |
| Cyclin A | 0.17      | 0.01      |
| CDK1     | 0.38      | -0.16     |
| Cdt1     | 2.41      | 0.62      |
| Cdc6     | 0.05      | 0.16      |
| Cyclin B | 3.13      | 1.00      |
| Pbk      | 5.58      | 2.36      |
| Cdc25c   | 2.09      | 0.76      |
| Plk1     | 2.30      | 0.52      |
| Wee1     | -0.42     | -0.32     |
| Myt1     | 1.75      | 3.15      |
| Aurka    | 1.68      | 0.27      |

B

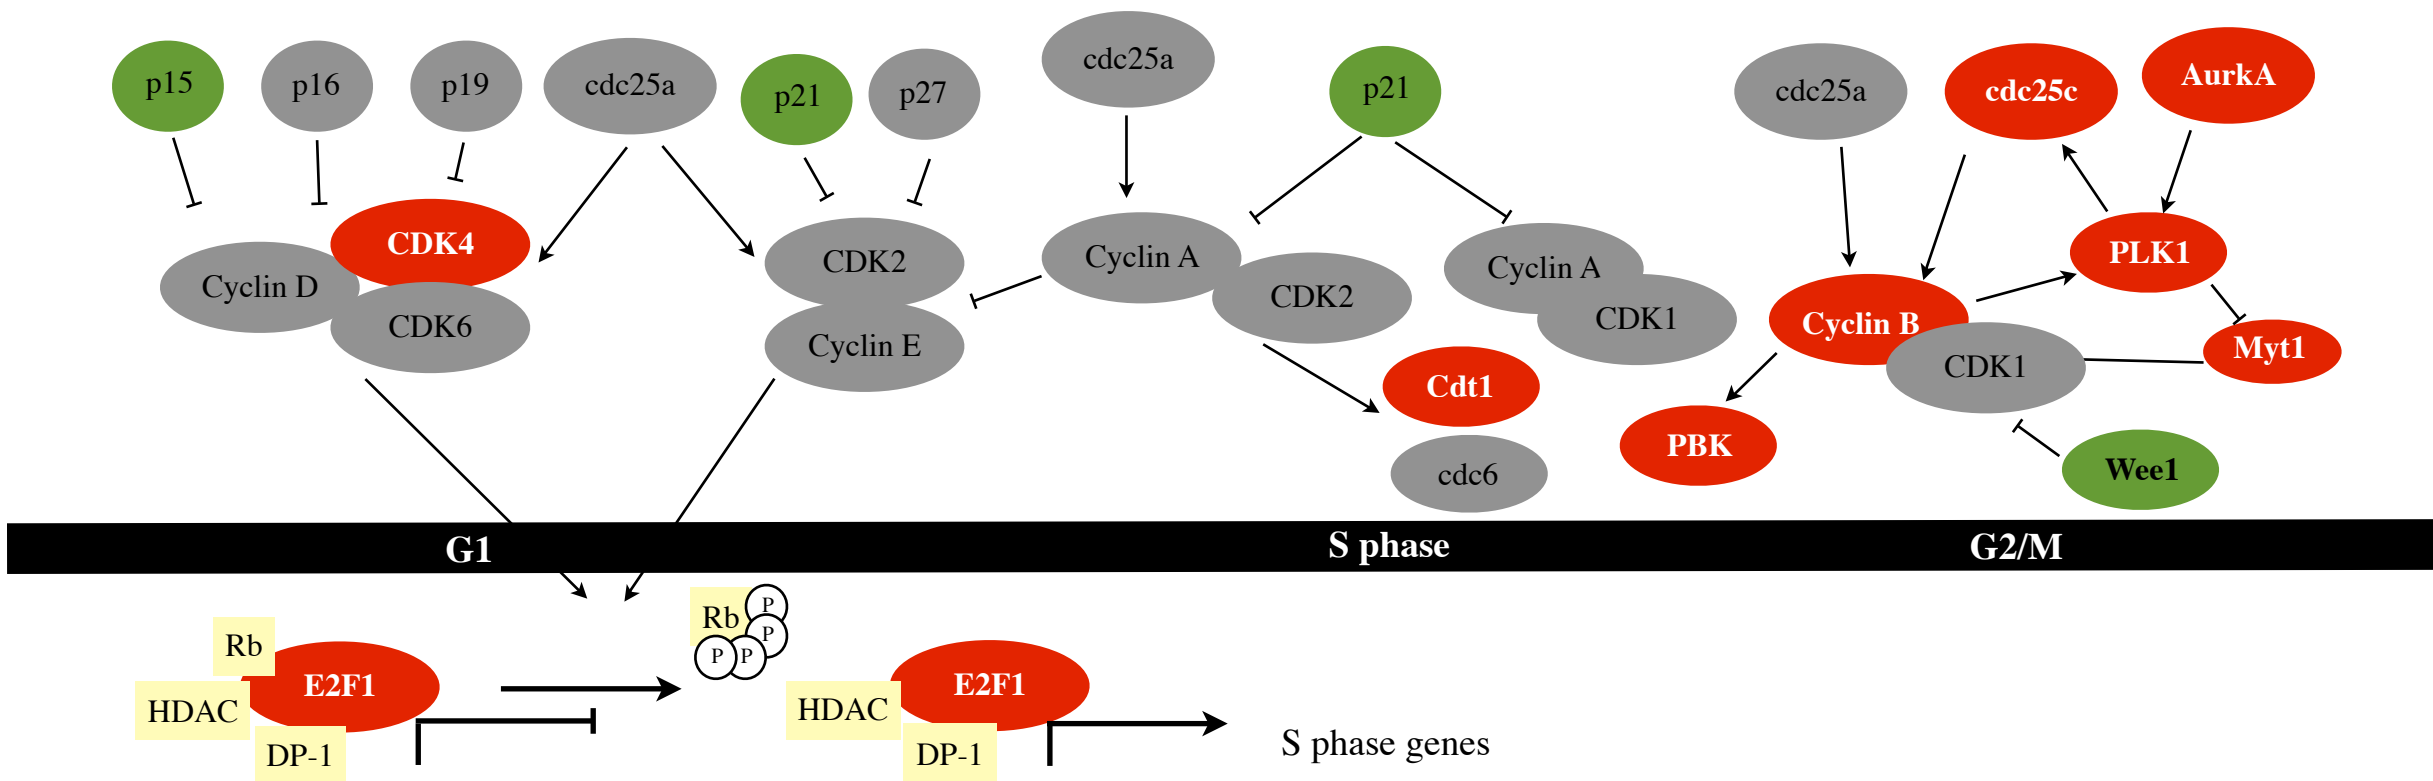

Supplement: 12861_2015_58_MOESM6_ESM.pdf [file 12861_2015_58_MOESM6_ESM.pdf]
