# Supplementary material for: Transcriptome analysis of the hormone-sensing cells in mammary epithelial reveals dynamic changes in early pregnancy
Source: PubMed Central journal article supplement (PMC4314744; doi:10.1186/s12861-015-0058-9), 2015-01-27
Supplement: 12861_2015_58_MOESM8_ESM.pdf [file 12861_2015_58_MOESM8_ESM.pdf]

| <b>Antigen</b>    | <b>Species</b> | <b>Dilution</b> | <b>Supplier</b>                      | <b>Cat #</b> | <b>Conjugate</b> |
|-------------------|----------------|-----------------|--------------------------------------|--------------|------------------|
| Cytokeratin 8     | Rat            | 1:100           | Developmental Studies Hybridoma Bank | TROMA-1      |                  |
| Estrogen Receptor | Mouse          | 1:100           | Novacastra                           | NCL-ER-6F11  |                  |
| CD45              | Rat            | 1:500           | Becton Dickinson                     | 550994       | PerCP-Cy5.5      |
| CD24              | Rat            | 1:250           | Becton Dickinson                     | 553261       | FITC             |
| CD49f             | Rat            | 1:500           | Becton Dickinson                     | 555736       | PE-Cy5           |
| Sca 1             | Rat            | 1:166           | Becton Dickinson                     | 558162       | PE-Cy7           |
| CD49b             | Hamster        | 1:250           | Becton Dickinson                     | 558759       | PE               |
