# Supplementary material for: Transcriptome analysis of the hormone-sensing cells in mammary epithelial reveals dynamic changes in early pregnancy
Source: PubMed Central journal article supplement (PMC4314744; doi:10.1186/s12861-015-0058-9), 2015-01-27
Supplement: 12861_2015_58_MOESM9_ESM.pdf [file 12861_2015_58_MOESM9_ESM.pdf]

| Mouse Gene ID            | Sequence 5'-3'             |
|--------------------------|----------------------------|
| HPRT (F)                 | CTGGTGAAAAGGACCTCTCG       |
| HPRT (R)                 | TGAAGTACTCATTATAGTCAAGGGCA |
| Estrogen Receptor (F)    | GCCAAGGAGACTCGCTACTG       |
| Estrogen Receptor (R)    | CTCCGGTTCTTGTCAATGGT       |
| Prgesterone Receptor (F) | GGTGGAGGTCGTACAAGCAT       |
| Prgesterone Receptor (R) | CTCATGGGTCACCTGGAGTT       |
| Elf5 (F)                 | GGACTCCGTAACCCATAGCA       |
| Elf5 (R)                 | TACTGGTCGCAGCAGAATTG       |
| Sca1 (F)                 | TGCAACCTTGTCTGAGAGGA       |
| Sca1 (R)                 | TGGGACTCCATAGCACTGGT       |
| Mcm5 (F)                 | CCATTGCCTGCCTGCTTTTT       |
| Mcm5 (R)                 | GACTTGGCTGTACCAGGGTC       |
| Bub1 (F)                 | GGAGATCCGAGCTGAAGTGT       |
| Bub1 (R)                 | TGAACAGCCTGCATTGCCTT       |
| Cdca 3 (F)               | CAGCTGAACGGTCTCAAACA       |
| Cdca 3 (R)               | TGGTCCTCAGGGGATAACTG       |
| Kntc1 (F)                | TGTCCGTCGGGAAGAAGTGT       |
| Kntc1 (R)                | CTTGAGCCAACACTCAGGCA       |
| Calcitonin (F)           | AAGAAGAAGTTCGCCTGCTG       |
| Calcitonin (R)           | CCAGCATGCAGGTACTIONCAGA    |
| RANKL (F)                | CCCACAATGTGTTGCAGTTC       |
| RANKL (R)                | TCCTGAGACTCCATGAAAACG      |
| Wnt 4 (F)                | ACTGGACTCCCTCCCTGTCT       |
| Wnt 4 (R)                | GGACGTCCACAAAGGACTGT       |
| Cyclin D1 (F)            | GGGTGGGTTGGAAATGAACT       |
| Cyclin D1 (R)            | CTTCCTCTCCAAAATGCCAG       |
| Wfdc (F)                 | TGGAGTCAAAGGCGAGGAGA       |
| Wfdc (R)                 | GCACGCATTTGAAGCCACAT       |
| Slpi (F)                 | GGACTGTGGAAGGAGGCAAA       |
| Slpi (R)                 | CCCAGTCAGTACGGCATTGT       |
| Sftpd (F)                | GTAGCCCAACAGAGAATGGC       |
| Sftpd (R)                | GAGAGCCCCATAGGTCCTG        |
| Dmbt (F)                 | CCGGCACAATGGGGATCT         |
| Dmbt (R)                 | AGAATCTGTTCCATCTGTGGGA     |
| IGF2 (F)                 | GTCGATGTTGGTGCTTCTCA       |
| IGF2 (R)                 | AAGCAGCACTCTTCCACGAT       |
| Mdk (F)                  | AGACCATCCGCGTGACTAAG       |
| Mdk (R)                  | GCTCTCTGGCCTCCTGACT        |
| IL-19 (F)                | ATCCTGTCCCTGGAGAACCT       |
| IL-19 (R)                | AAAGAGTTGGCAATGCTGCT       |
| IL-33 (F)                | ATTTCCCCGGCAAAGTTC         |
| IL-33 (R)                | CTTATGGTGAGGCCAGAACG       |
